# Supplementary material for: Treatment impact of newly approved therapeutic agents for metastatic urothelial carcinoma in Japan: a single-center retrospective study
Source: Research Square preprint supplement (doi:10.21203/rs.3.rs-2983537/v1), 2023-06-05
Supplement: Supplementary file 1 [file 09b191981420a83c16f0d6b1.xlsx]

## Sheet: Sheet1
Table2. Best overall response of each line of systemic therapy.
		Pre new drug era (N=78)	Post new drug era (N=72)	Overall (N=150)	p
1st line	SD+PR+CR	43	44	87	0.864
	PD	29	27	56
2nd line	SD+PR+CR	14	24	38	0.201
	PD	25	24	49
3rd line	SD+PR+CR	6	10	16	0.0216
	PD	11	2	13
4th line	SD+PR+CR	1	0	1	1
	PD	5	2	7
