# Supplementary material for: Treatment impact of newly approved therapeutic agents for metastatic urothelial carcinoma in Japan: a single-center retrospective study
Source: Research Square preprint supplement (doi:10.21203/rs.3.rs-2983537/v1), 2023-06-05
Supplement: Supplementary file 2 [file 1fc65f89296f5b299201444f.xlsx]

## Sheet: Sheet1
Table3. The multivariate Cox proportional hazard regression model to identify the prognostic factors for overall survival.
	Hazard ratio (95% CI)	p value
Post new drug era	0.48 (0.30-0.77)	0.002
Cisplatin administration	0.73 (0.43-1.22)	0.23
Administration of second-line or more	0.43 (0.27-0.70)	<0.001
Liver metastasis	1.78 (0.91-3.50)	0.092
NLR	0.98 (0.92-1.04)	0.423
First-line BOR: CR+PR+SD	0.23 (0.14-0.38)	<0.001
PS	1.32 (0.94-1.86)	0.114
Serum albumin	0.42 (0.24-0.73)	0.002
CRP	1.24 (1.10-1.39)	<0.001
Number of initial metastatic site	1.09 (0.85-1.39)	0.492
