# Supplementary material for: Treatment impact of newly approved therapeutic agents for metastatic urothelial carcinoma in Japan: a single-center retrospective study
Source: Research Square preprint supplement (doi:10.21203/rs.3.rs-2983537/v1), 2023-06-05
Supplement: Supplementary file 3 [file ed6177bf533c0204fa2152a8.xlsx]

## Sheet: Sheet1
Table1. Baseline characteristics of the patients at an initial diagnosis of metastasis.
			Pre new drug era	Post new drug era	p
			(N=78)	(N=72)
Age			69.5 (38-88)	74.5 (48-87)	0.00417
Sex	Male		61	51	0.349
	Female		17	21
BMI			21.3 (14.9-28.7)	22.8 (14.9-32.8)	0.21
PS	0		28	28	0.474
	1		35	27
	2		14	13
	3		1	4
CCI	0		33	36	0.411
	1		28	18
	2		14	11
	3		2	5
	4		1	2
Alb			4.0 (2.2-5.1)	3.8 (2.2-4.7)	0.00869
CRP			0.49 (0.01-13.9)	0.57 (0.02-15.9)	0.294
eGFR			53.7 (20.9-135.2)	50.1 (5.43-111.3)	0.0337
Hb			11.9 (7.6-16.6)	12.1 (7.6-15.1)	0.561
Tumor location	BC		34	35	0.623
	UTUC		44	37
Presence of variant histology or non-UC			19	17	1
Cisplatin administration			52	51	0.602
History of radical surgery			46	34	0.19
Initial metastatic site	Regional lymph node		38	44	0.142
	Distant lymph node		22	21	1
	Visceral		42	32	0.258
	Liver		9	9	1
	Lung		22	13	0.177
	Bone		18	14	0.691
	Others		16	21	0.257
Number of initial metastatic site	1		45	37	0.554
	2		23	24
	3		7	5
	>=4		3	6
